# Supplementary material for: The Splicing Factor Proline-Glutamine Rich (SFPQ/PSF) Is Involved in Influenza Virus Transcription
Source: PubMed Central journal article supplement (PMC3219729; doi:10.1371/journal.ppat.1002397), 2011-11-17
Supplement: ppat.1002397.s003.pdf [file ppat.1002397.s003.pdf]

| RNA type | Target segment | Sequence (5'- 3')                   | Length (nt) | Formamide (%) |
|----------|----------------|-------------------------------------|-------------|---------------|
| vRNA     | M              | AGATGCAACGATTCAAGTGACCCTCTTGTT      | 30          | 41,1          |
|          | NP             | AAAACCAGAAGAAGTGTCCCTCCGTGGGCG      | 30          | 47,4          |
|          | NS             | AGGACTTGAATGGAATGATAACACAGTTCGA     | 31          | 39,4          |
| mRNA     | M              | TTTTTTTTTTTTTTTTTTTTACTCCAGTTCAATG  | 36          | 30,4          |
|          | NP             | TTTTTTTTTTTTTTTTTTTTCTTAATTGTCGTAC  | 34          | 28,7          |
|          | NS             | TTTTTTTTTTTTTTTTTTTTATCATTAAATAAGCT | 37          | 25,6          |

| <b>RNA type</b> | <b>Target segment</b> | <b>Sequence (5'- 3')</b>       | <b>Length (nt)</b> | <b>Formamide (%)</b> |
|-----------------|-----------------------|--------------------------------|--------------------|----------------------|
| <b>cRNA</b>     | <b>M</b>              | AGTAGAAACAAGGTAGTTTTTACTCCAGT  | 30                 | 34,9                 |
|                 | <b>NP</b>             | AGTAGAAACAAGGGTATTTTTCCTTAATTG | 30                 | 32,7                 |
|                 | <b>NS</b>             | AGTAGAAACAAGGGTGTTTTTTATCATTAA | 30                 | 30,6                 |

| Target gene | Type                 | Sequence (5'- 3')             | Fragment size (bp) |
|-------------|----------------------|-------------------------------|--------------------|
| NS1 intron  | Forward              | CCATGTTGGAAAGCAGATAGTAGAGA    | 105                |
|             | Reverse              | ATGTCAGTTATGTATCGCGAAGCA      |                    |
|             | Taqman probe Forward | FAM-ATGAGGCGCTTACAATGA-NFQ    |                    |
| NS2 border  | Forward              | GCAGGGTGACAAAGACATAATGGAT     | 93                 |
|             | Reverse              | GATGAGGACCCCAATTGCATTTT       |                    |
|             | Taqman probe Reverse | FAM-TAGTATGTCCTGAAAACCTTG-NFQ |                    |
| Total NS    | Forward              | CATCGGAGGACTTGAATGGAATGAT     | 92                 |
|             | Reverse              | GTCCCCCATTCTCATTACTGCTT       |                    |
|             | Taqman probe Forward | FAM-AAACTCTACAGAGATTCGC-NFQ   |                    |
